# Supplementary material
Source: PubMed Central journal article supplement (PMC4758687)
Supplement: NIHMS722227-supplement-suppl.pdf [file NIHMS722227-supplement-suppl.pdf]

**Supplement to**

**Endothelial Nitric Oxide Synthase-Derived Nitric Oxide Prevents  
Dihydrofolate Reductase Degradation by Promoting S-Nitrosylation**

Zhejun Cai, Qiulun Lu, Ye Ding, Qilong Wang, Lei Xiao, Ping Song, Ming-Hui  
Zou

## Supplemental Figures

### Supplemental Figure I

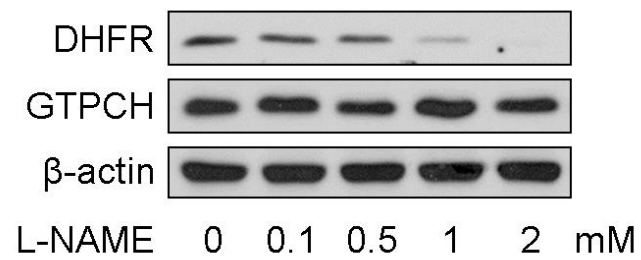

**Supplemental Figure I. eNOS inhibitor L-NAME dose-dependently reduces DHFR expression in HUVECs.** L-NAME reduced DHFR expression from 1mM to 2mM range, but had no effect on GTPCH expression.

## Supplemental Figure II

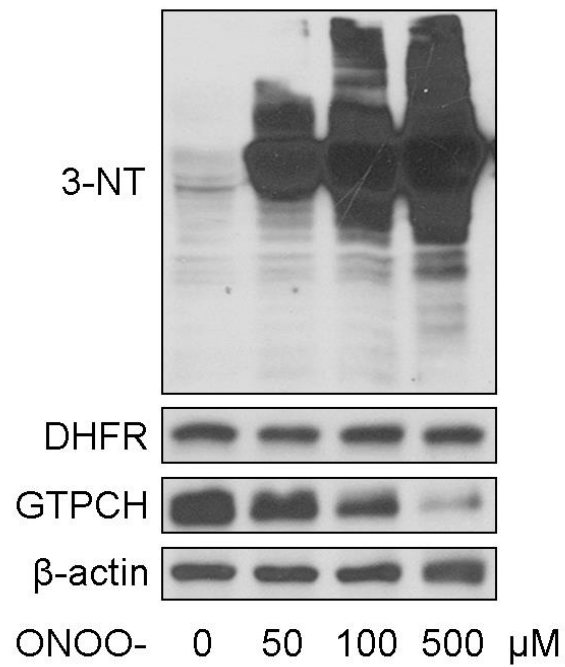

**Supplemental Figure II. ONOO- does not alter DHFR expression in HUVECs.** Tyrosine nitration of proteins as determined by 3-nitrotyrosine (3-NT) increased as the dose of ONOO- supplementation increased. ONOO- treatment reduced GTPCH expression in a dose-dependent manner, but had no effect on DHFR expression.

### Supplemental Figure III

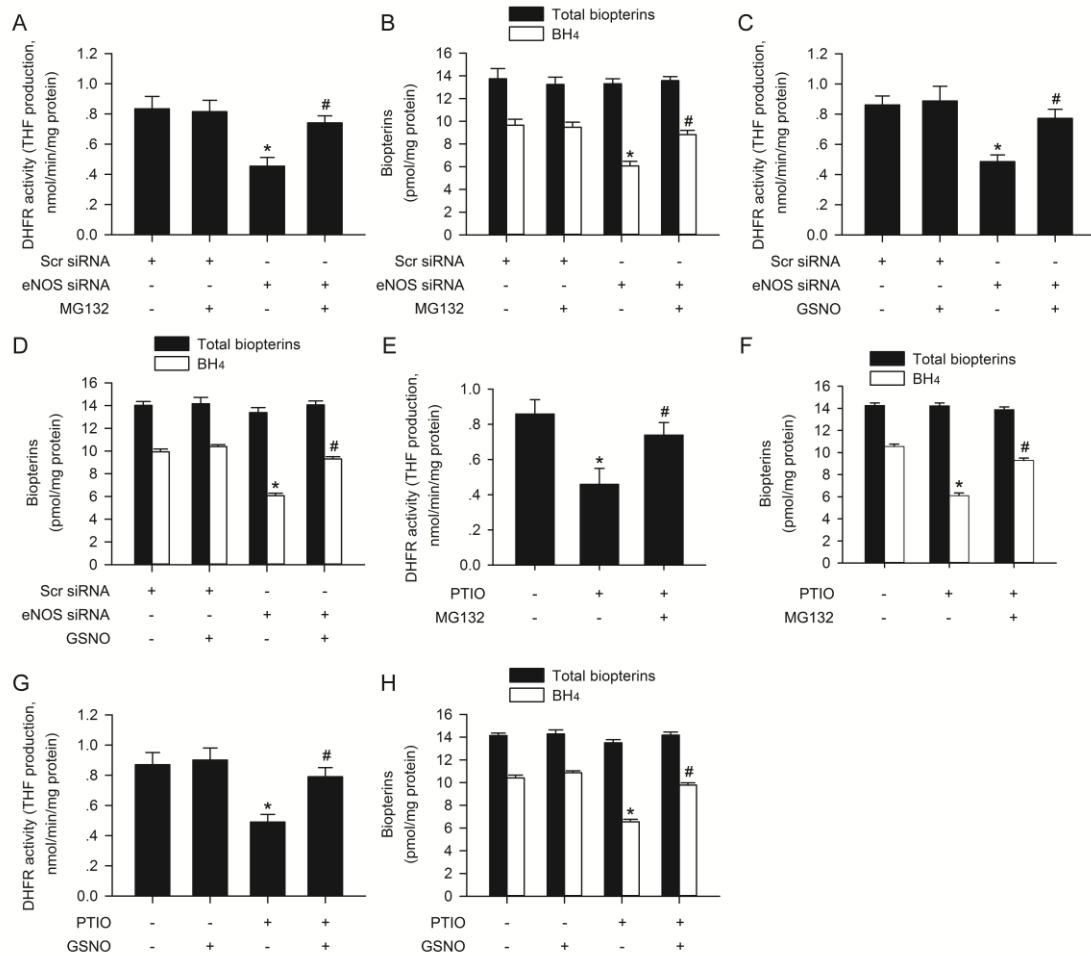

**Supplemental Figure III. NO depletion reduces DHFR activity and BH<sub>4</sub> levels in HUVECs.** MG132 (1μM, 6h) prevented eNOS silencing caused DHFR activity (**A**) and BH<sub>4</sub> contents (**B**) reduction. GSNO (100μM) supplementation reversed DHFR activity (**C**) and BH<sub>4</sub> contents (**D**) reduced by eNOS silencing. MG132 (1μM, 6h) and GSNO (100μM) also prevented PTIO (150μM) induced DHFR activity (**E and G**) and BH<sub>4</sub> contents (**F and H**) reduction in HUVEC. (n=3; \*p<0.05 vs. Scr siRNA in **A-D**, or p<0.05 vs. control in **E-H**; #p<0.05 vs. eNOS siRNA in **A-D**, or p<0.05 vs. PTIO in **E-H**)

## Supplemental Figure IV

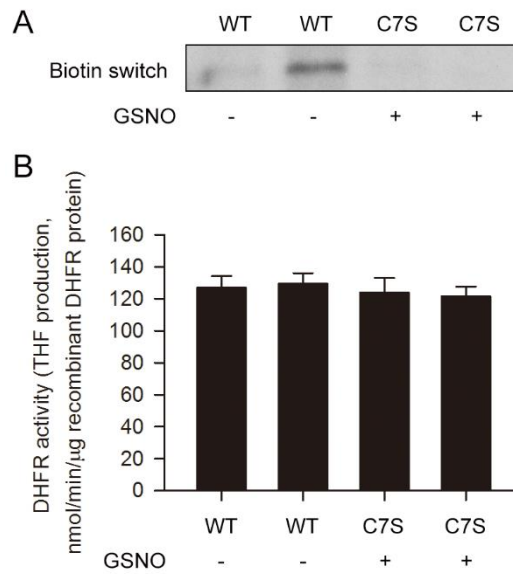

**Supplemental Figure IV. S-nitrosylation of DHFR does not affect its activity in vitro.** (A) GSNO (100 $\mu$ M) incubation increased S-nitrosylation of WT DHFR but not C7S DHFR in vitro. (B) Recombinant WT and C7S DHFR exhibited no difference in activities. GSNO incubation did not alter their activities.
